# Supplementary material for: Fibroblast activation in response to TGFβ1 is modulated by co-culture with endothelial cells in a vascular organ-on-chip platform
Source: PubMed Central journal article supplement (PMC10421749; doi:10.3389/fmolb.2023.1160851), 2023-07-28
Supplement: DataSheet1.pdf [file DataSheet1.pdf]

*Supplementary Material*

**Fibroblast activation in response to TGF $\beta$ 1 is modulated by co-culture with endothelial cells in a vascular organ-on-chip platform**

Rebecca Luu<sup>1†</sup>, B. Christopher Hoefler<sup>1,a†</sup>, Ashley L. Gard<sup>1</sup>, Casey R. Ritenour<sup>2</sup>, Miles T. Rogers<sup>1,b</sup>, Ernest S. Kim<sup>1</sup>, Jonathan R. Coppeta<sup>1</sup>, Brian P. Cain<sup>1</sup>, Brett C. Isenberg<sup>1</sup>, Hesham Azizgolshani<sup>1</sup>, Oscar R. Fajardo-Ramirez<sup>3</sup>, Guillermo García-Cardena<sup>3</sup>, Matthew P. Lech<sup>4</sup>, Lindsay Tomlinson<sup>4</sup>, Joseph L. Charest<sup>1</sup>, Corin Williams<sup>1\*</sup>

\*Correspondence: Corin Williams, [cwilliams@draper.com](mailto:cwilliams@draper.com)

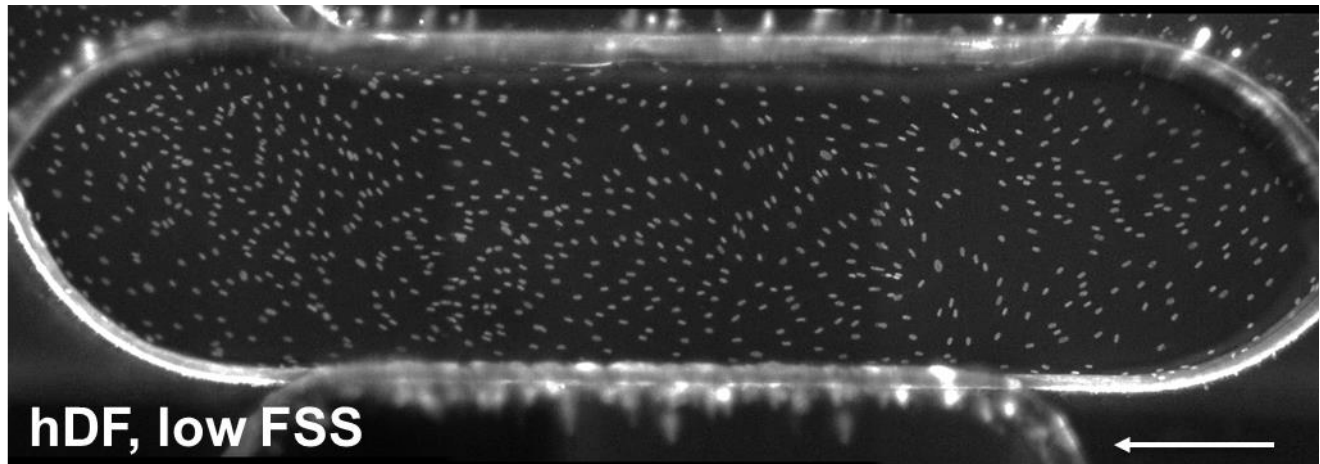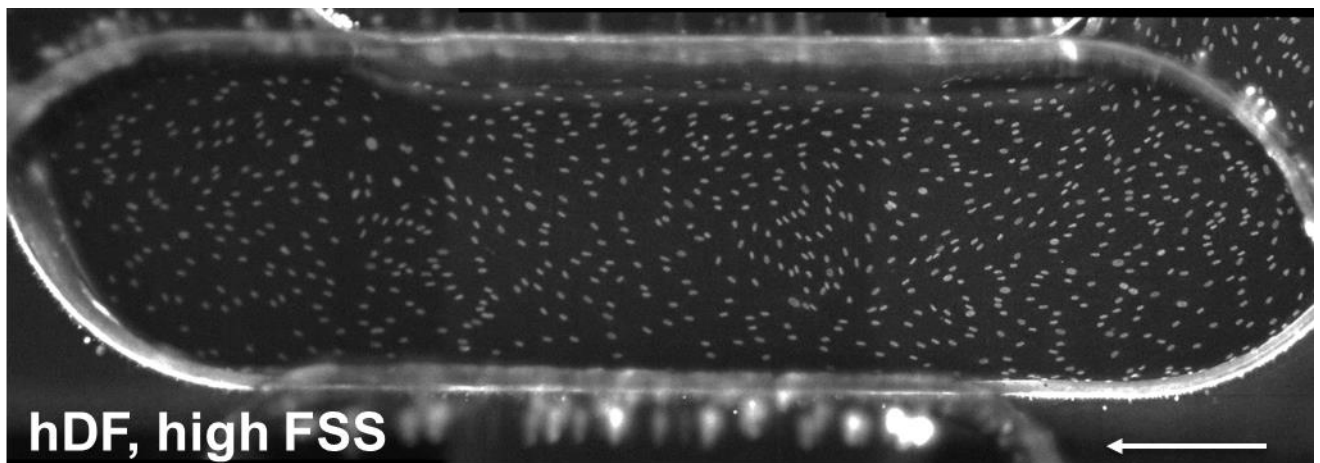

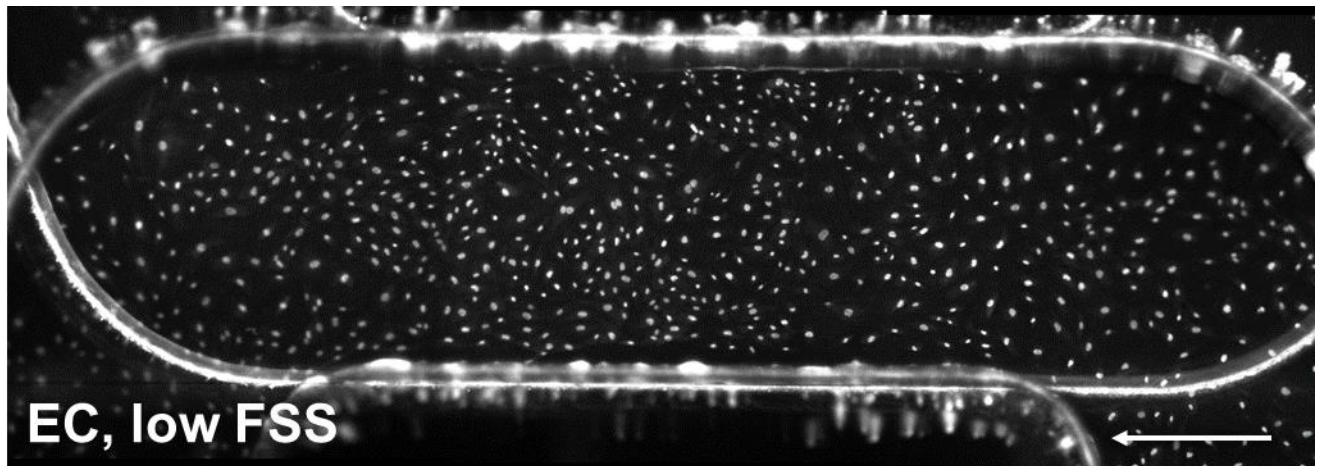

16

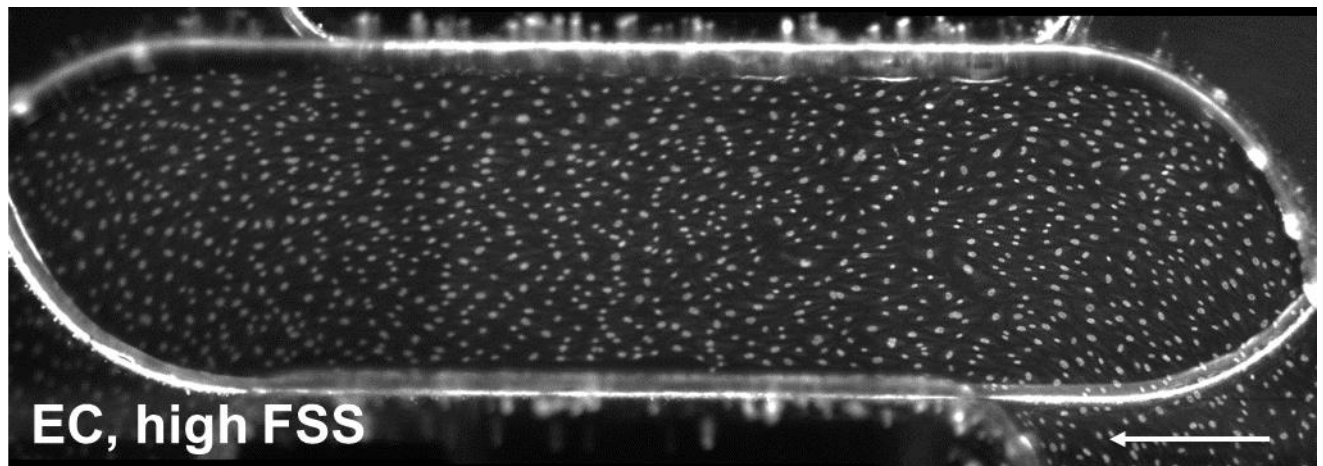

17

18 **Supplementary Figure 1: Cell nuclei under low and high FSS.** Representative images of each cell  
19 type under low and high FSS conditions, without TGF $\beta$ 1. hDF, which are not directly exposed to FSS,  
20 do not show any qualitative changes in cell nuclei orientation. EC exposed to low FSS show  
21 disorganized nuclei, while EC under high FSS show more uniform coverage and nuclei size with  
22 orientation towards flow. Arrows in the bottom right indicate the direction of flow in the bottom  
23 channel.

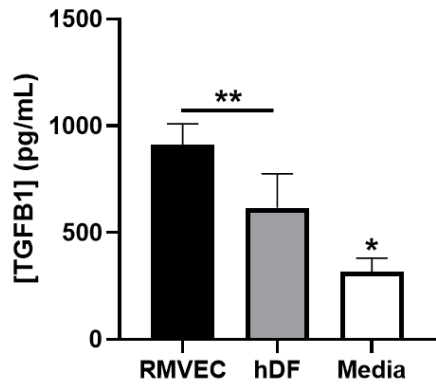

24

25 **Supplementary Figure 2: TGFβ1 production by EC and hDF.** Endogenous levels of TGFβ1 from  
26 EC, hDF, and blank co-culture media was determined by ELISA. Baseline media levels were  
27 significantly lower than both cell types. One-way ANOVA with Tukey's post-hoc test was used, N =  
28 8 per condition. \* p < 0.001; \*\* p < 0.0001

29

**A**

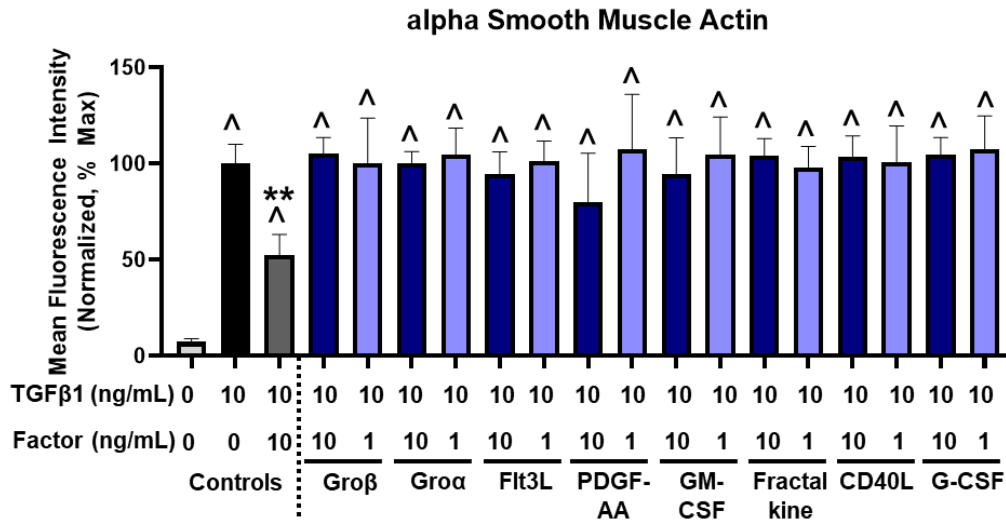

30

**B**

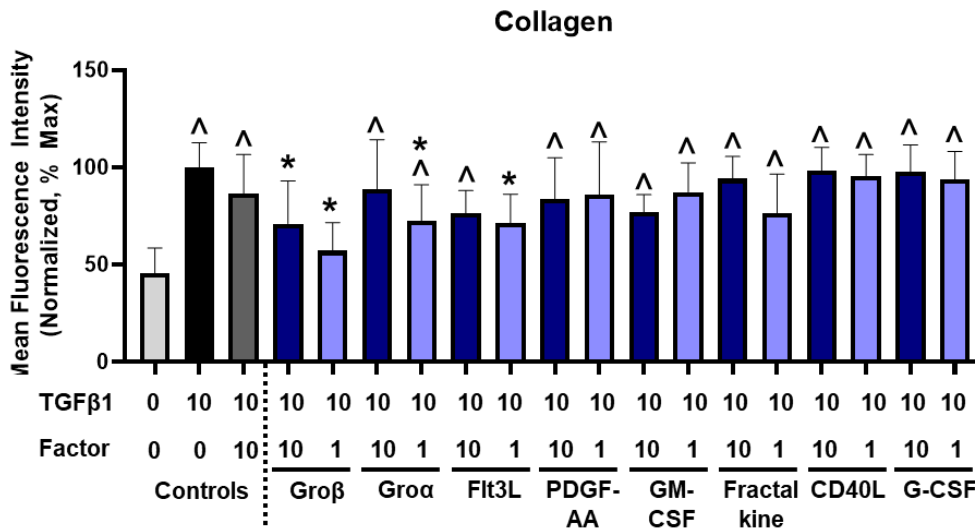

31

32 **Supplementary Figure 3: The effect of growth factors and cytokines on hDF activation.** Various  
 33 factors that were identified in EC conditioned media were tested with hDF mono-cultures stimulated  
 34 with TGFβ1. The mean fluorescence intensity of (A) SMA and (B) collagen were measured and  
 35 normalized to the TGFβ1-treated control condition (assumed to be 100%). One-way ANOVA with  
 36 Tukey's posthoc test was used for statistical analysis, N = 6-7 samples per condition across two  
 37 independent experiments. ^ p < 0.05 relative to untreated control; \* p < 0.05 with respect to TGFβ1-  
 38 treated control; \*\* p < 0.0001 with respect to TGFβ1-treated control.

### Fibroblast activation in vascular organ-on-chip

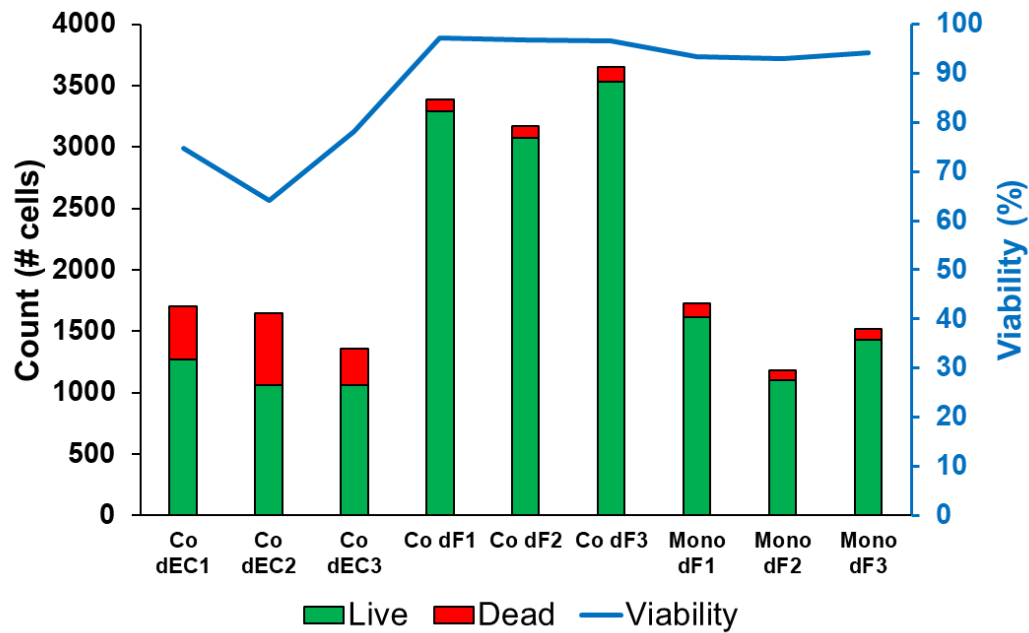

39

40 **Supplementary Figure 4: Cell numbers and viability for single cell RNA-sequencing.** Cell count  
41 (left y-axis) and viability (right y-axis, blue) were determined by flow cytometry. Live/dead numbers  
42 (green and red bars) were determined by acridine orange and propidium iodide and used to calculate  
43 the percentage of cells that were viable (blue line).

44

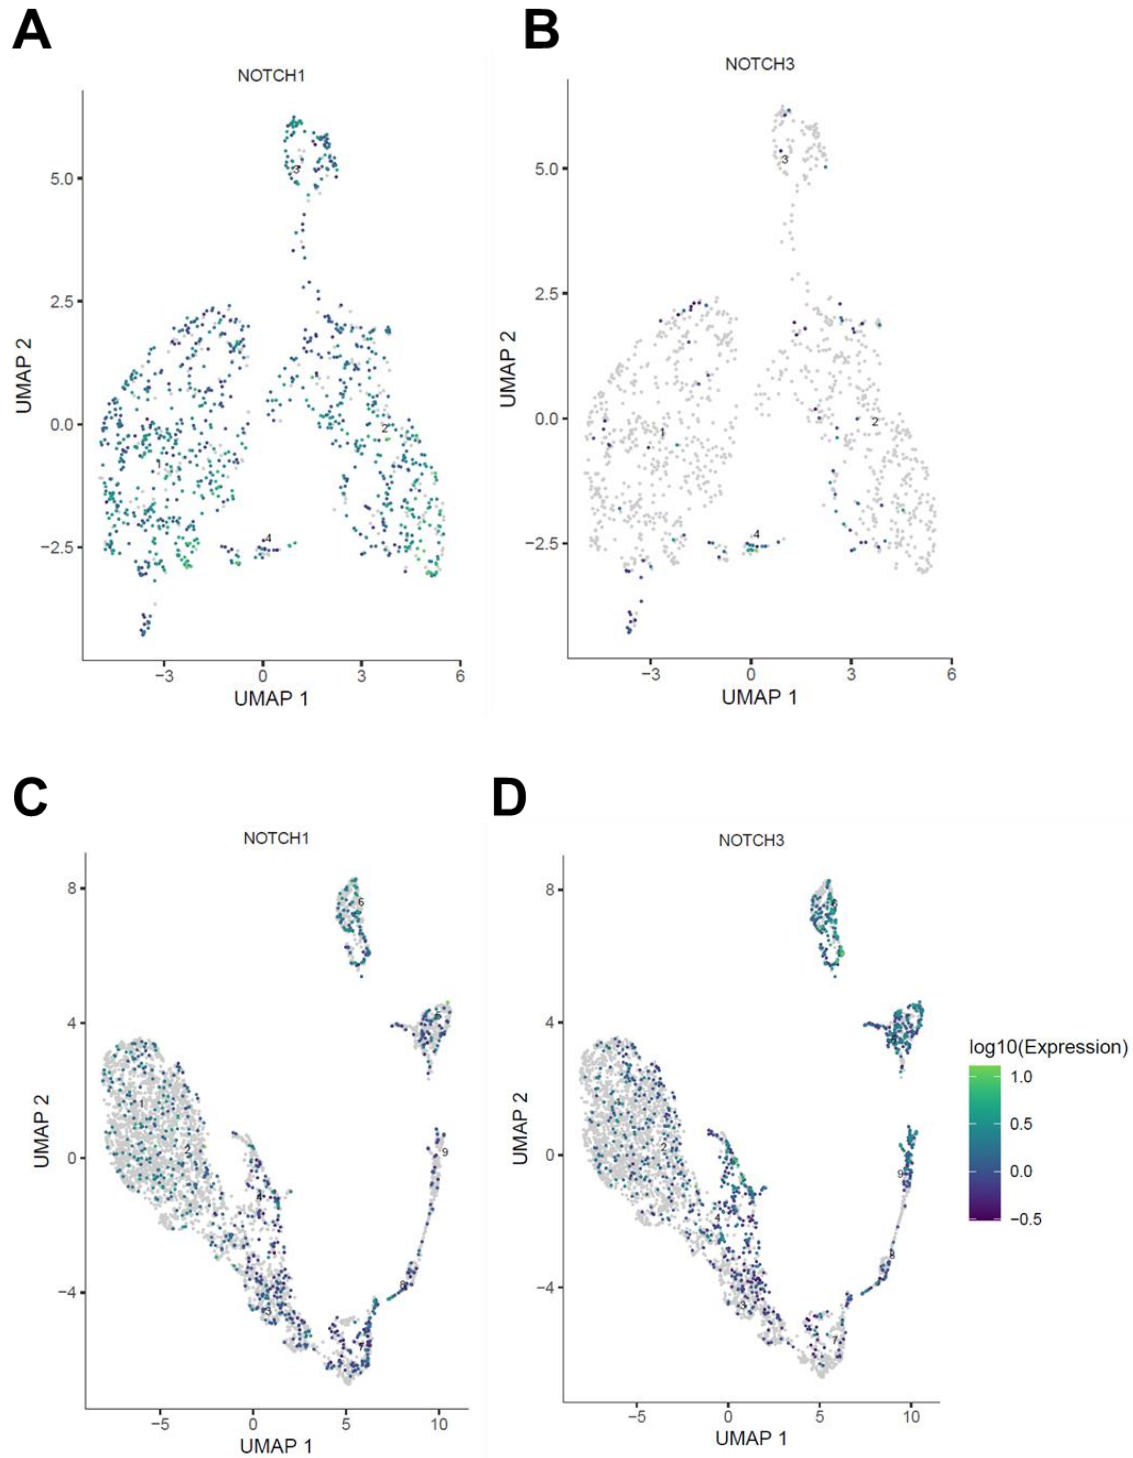

45

46

47 **Supplementary Figure 5: Selective Notch receptor expression within cell subtypes by scRNA-seq.**  
 48 (A) EC express NOTCH1 at high levels and (B) NOTCH3 at low to non-existent levels. While some  
 49 NOTCH1 expression is observed in (C) hDF among the matrix-producing populations, (D) NOTCH3  
 50 is highly expressed by most hDF, including proliferating, activated, and matrix-producing phenotypes.

51

52 **Supplementary Table 1: Growth Factors and Cytokines Used**

| <i>Factor (Alternative Names)</i> | <i>Vendor</i> | <i>Catalog #</i> | <i>Vehicle</i>       |
|-----------------------------------|---------------|------------------|----------------------|
| Gro $\alpha$ (CXCL1/KC/CINC-1)    | R&D Systems   | 275-GR-010/CF    | PBS                  |
| CD40 Ligand (TNFSF5)              | R&D Systems   | 6420-CL-025/CF   | PBS                  |
| Fractalkine (CX3CL1)              | R&D Systems   | 365-FR-025/CF    | PBS                  |
| Gro $\beta$ (CXCL2/MIP-2/CINC-3)  | R&D Systems   | 276-GB-010/CF    | PBS                  |
| G-CSF                             | R&D Systems   | 214-CS-005/CF    | 10 mM acetic acid    |
| PDGF-AA                           | R&D Systems   | 221-AA-010       | 4 mM HCl             |
| Flt-3 Ligand                      | R&D Systems   | 308-FKE-010      | PBS                  |
| GM-CSF                            | R&D Systems   | 7954-GM-010/CF   | PBS                  |
| FGF-2                             | PeptoTech     | 108-18B          | PBS                  |
| TGF $\beta$ 1                     | R&D Systems   | 7754-BH-005/CF   | 0.5% BSA in 4 mM HCl |

53

54 **Supplementary Table 2: Intra- and Inter-plate Variability**

| <i>SMA MFI</i>                | <i>Mono-culture (-)</i> | <i>Mono-culture (+)</i> | <i>Co-culture (-)</i> | <i>Co-culture (+)</i> |
|-------------------------------|-------------------------|-------------------------|-----------------------|-----------------------|
| Intra-plate variability (1)   | 3.1%                    | 9%                      | 3.4%                  | 9.6%                  |
| Intra-plate variability (2)   | 32%                     | 17.5%                   | 8.2%                  | 18.8%                 |
| Intra-plate variability (3)   | 19%                     | 7.1%                    | 2.5%                  | 6.2%                  |
| Inter-plate variability (avg) | 18%                     | 11.2%                   | 4.7%                  | 11.5%                 |

55 Intra-plate coefficient of variance (CV) was calculated for technical replicates within the plate (N=3-  
 56 4) for each of 3 independent PREDICT96 plates. Inter-plate variability was calculated by averaging  
 57 the CV values across the 3 plates for a given condition.
